# Supplementary material
Source: publisher figshare collection journal article supplement (https://karger.figshare.com/ndownloader/files/8718490)
Supplement: Supplementary file 1 [file 8718490]

**Appendix 1. List of contributing investigators**

The following Principal Investigators and their institutions contributed to the study

| **Name** | **INSTITUTION** | **Country** |
| --- | --- | --- |
| Ursula Schmidt-Erfurth | Univ.Klin. f. Augenheilkunde, Allgemeines Krankenhaus, Vienna | Austria |
| Ulrich Schoenherr | Abteilung für Augenheilkunde Hospital BHB, Linz | Austria |
| Peter Kertes | Sunnybrook Health Sciences Center, Toronto | Canada |
| Patrick Ma | Vancouver General Hospital, UBC Eye Care Centre, Vancouver | Canada |
| Sebastien Olivier | CSA RC Aile F, Hopital Maisonneuve-Rosemont, Montreal | Canada |
| Carl Arndt | Service d'Ophtalmologie, Hôpital Robert Debré, Reims | France |
| Salomon-Yves Cohen | Centre d'Ophtalmo Imagerie Laser, Paris | France |
| Catherine Creuzot-Garcher | Département d'Ophtalmologie, Hopital General, Dijon | France |
| Jean-Francois Korobelnik | Service d'Ophtalmologie, Hopital Pellegrin, Bordeaux Cedex | France |
| Veronique Pagot-Mathis | Service d'Ophtalmologie, CHU Paule Viguier Site de Purpan, Toulouse | France |
| Nicole Eter | Uniklinik Muenster /Klinik und Poliklinik für Augenheilkunde, Muenster | Germany |
| Andrea Maria Gamulescu | Augenklinik, Klinikum der Universität Regensburg, Regensburg | Germany |
| Lutz Hansen | Augenklinik, Univ.-Klinikum Freiburg, Freiburg | Germany |
| Frank Holz | Univ.-Klinikum Bonn, Ophthalmologische Abt./Augenklinik, Bonn | Germany |
| Antonia Joussen | Augenklinik Charité Berlin Campus Virchow-Klinikum, Berlin | Germany |
| Bernd Kirchhof | Universitätskliniken Köln - Zentrum für Augenheilkunde, Koeln | Germany |
| Chris Patrick Lohmann | Augenklinik, Klinikum rechts der Isar der TU München, München | Germany |
| Gisbert Richard | Ophthalmology, Universitaetsklinikum Hamburg-Eppendorf, Hamburg | Germany |
| Wolfgang Schrader | Maximilians-Augenklinik, Nuernberg | Germany |
| Georg Spital | Augenarztpraxis, St. Franziskus-Hospital, Muenster | Germany |
| Timothy Lai | Dept of Ophthalmology & Visual, Chinese University of Hong Kong, University Eye Center, Hong Kong | Hong Kong |
| Andras Berta | Department of Ophthalmology, University Medical School of Debrecen, Debrecen | Hungary |
| Janos Nemeth | Semmelweis Egyetem I, Szemeszeti Klinika, Budapest | Hungary |
| Rajvardhan Azad | Dr.R.P.Centre for Ophthalmic Sciences, New Delhi | India |
| Sundaram Natarajan | Aditya Jyot Eye Hospital Pvt. Ltd., Mumbai, Maharashtra | India |
| Anand Rajendran | Aravind Eye Hospital Retina Department - AECS, MaduraiTamil Nadu | India |
| Naresh Kumar Yadav | Narayana Nethralaya, Bangalore | India |
| Francesco Bandello | Divisione Oculistica, Fondazione Centro San Raffaele del Monte Tabor IRCCS, Milan | Italy |
| Paolo Lanzetta | Clin.Oculistica-Pad.Petracco, A.O.Univers.S.Maria della Misericordia Udine - Univer.Studi , Dip.Chirurgie Specialistiche, Udine | Italy |
| Carlo Sborgia | Clinica Oculistica- U.O. Oftalmologia I, Az.Osp.Univ.Consorziale Polic. di Bari, Bari | Italy |
| Giovanni Staurenghi | U.O. di Oculistica, Azienda Ospedaliera Luigi Sacco-Polo Universitario, Milan | Italy |
| Yasushi Ikuno | Ophthalmology, Osaka University Hospital, Osaka | Japan |
| Tatsuro Ishibashi | Ophthalmology, Kyushu University Hospital, Fukuoka | Japan |
| Susumu Ishida | Ophthalmology, Hokkaido University Hospital, Hokkaido | Japan |
| Toshinori Murata | Ophthalmology, Shinshu University Hospital, Nagano | Japan |
| Yuichiro Ogura | Ophthalmology, Nagoya City University Hospital, Nagoya-City, Aichi | Japan |
| Annabelle Ayame Okada | Ophthalmology, Kyorin University Hospital, Tokyo | Japan |
| Tetsuju Sekiryu | Ophthalmology, Fukushima Medical University Hospital, Fukushima | Japan |
| Fumio Shiraga | Ophthalmology, Kagawa University Hospital, Kagawa | Japan |
| Kanji Takahashi | Ophthalmology, Kansai Medical University Hirakata Hospital, Osaka | Japan |
| Hiroko Terasaki | Ophthalmology, Nagoya University Hospital, Nagoya-City, Aichi | Japan |
| Yasuo Yanagi | Ophthalmology, The University of Tokyo Hospital, Tokyo | Japan |
| Nagahisa Yoshimura | Ophthalmology, Kyoto University Hospital, Kyoto | Japan |
| Mitsuko Yuzawa | Ophthalmology, Surugadai Nihon University Hospital, Tokyo | Japan |
| Hum Chung | Ophthalmology, Seoul National University Hospital, Seoul | Korea |
| Sewoong Kang | Ophthalmology, Samsung Medical Center, Seoul | Korea |
| Sungchul Lee | Ophthalmology, Severance Hospital, Seoul | Korea |
| Younghee Yoon | Ophthalmology, Asan Medical Center, Seoul | Korea |
| Rimvydas Stanislovas Asoklis | Centre of Eye Diseases, Vilnius University Hospital, Santariskiu Clinic, Vilnius | Lithuania |
| Edward Wylegala | Gabinet Okulistyczny, prof. dr hab. Edward Wylegala, Bielsko-Biala | Poland |
| Angela Carneiro | Serviço de Oftalmologia, HSJ-HOSPITAL DE SÃO JOÃO, E.P.E., Porto | Portugal |
| Nikolle Tan | Tan Tock Seng Hospital - Ophthalmology, Singapore | Singapore |
| Ajeet Madhav Wagle | Khoo Teck Puat Hospital, Singapore | Singapore |
| Jaroslav Hasa | UN Bratislava, Nemocnica Ruzinov, Klinika oftalmologie, Bratislava | Slovak Republic |
| Maria Molnarova | FNsP F.D. Roosevelta, II. Ocna klinika SZU, Banska Bystrica | Slovak Republic |
| Javier Araiz | Instituto Clinico Quirurgico de Oftalmologia, Bilbao | Spain |
| Luis Arias Barquet | Hospital Universitari de Bellvitge, Consultas externas Modulo B3 - Oftalmología, Barcelona | Spain |
| Maria Isabel Lopez Gálvez | Instituto de Oftalmobiologia Aplicada, IOBA, Campus Miguel Delibes, Valladolid | Spain |
| Jose Maria Ruiz Moreno | Vissum Alicante, Instituto Oftalmologico de Alicante, Alicante | Spain |
| Aude Ambresin | Hôpital Ophtalmique Jules-Gonin, Lausanne | Switzerland |
| Ioannis Petropoulos | Centre ophtalmologique de Rive, Genève | Switzerland |
| Hakan Durukan | Gulhane Military Medical Academy. Dedepasa Cad. Elif Sok No. 2, Etlik/Ankara | Turkey |
| Bora Eldem | Hacettepe University Medical Faculty Ophthalmology, Ankara | Turkey |
| Emin Ozmert | Ankara University Medical Faculty Ophthalmology, Ankara | Turkey |
| Gursel Yilmaz | Baskent University Medical Faculty Ophthalmology, Ankara | Turkey |
| Usha Chakravarty | Level 8D, c/o Ward 31, E&E clinic, Royal Victoria Hospital, Belfast | United Kingdom |
| Mohammed Majid | Bristol Eye Hospital, Bristol | United Kingdom |
| Niro Narendran | Eye Infirmary, The Royal Wolverhampton Hospitals NHS Trust, Wolverhampton | United Kingdom |
